# Supplementary material for: A Powerful Molecular Engineering Tool Provided Efficient Chlamydomonas Mutants as Bio-Sensing Elements for Herbicides Detection
Source: PubMed Central journal article supplement (PMC3629139; doi:10.1371/journal.pone.0061851), 2013-04-17

**Figure S1** Growth rate curves of the reference strain IL and D1 random mutants of *C. reinhardtii* selected for their PSII long-term stability under oxidative stress-related conditions. The time course of cell culture growth were followed for a period of 88 h under growth conditions by measuring: **A)** culture optical density ( $OD_{750}$ ) and **B)** total chlorophyll content ( $\mu\text{g mL}^{-1}$ ). Average values from four different cultures are presented,  $\pm\text{SE}$ ,  $n=4$ .

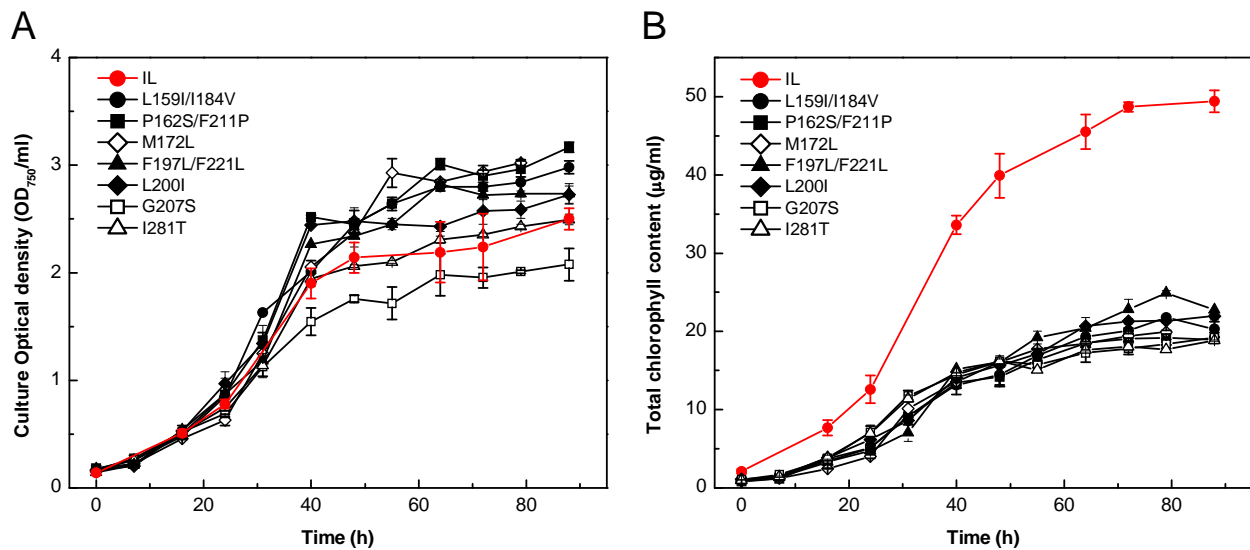

Supplement: pone.0061851.s001.pdf [file pone.0061851.s001.pdf]
